# Supplementary material for: Retinal stem cells modulate proliferative parameters to coordinate post-embryonic morphogenesis in the eye of fish
Source: eLife. 2019 Mar 26;8:e42646. doi: 10.7554/eLife.42646 (PMC6486154; doi:10.7554/eLife.42646)
Supplement: Figure 3—source data 5. — Wilcoxon rank sum test applied to the data in Figure 3D rounded to two digits. [file elife-42646-fig3-data5.xlsx]

## Sheet: Sheet1
samples compared	Wilcoxon rank sum test
NR-RPE	p = 3.93∙10-6
NR-inducer	p = 0.64
NR-responder	p = 3.26∙10-4
RPE-inducer	p = 6.24∙10-7
RPE-responder	p = 0.38
inducer-responder	p = 7.00∙10-5
